# Supplementary material
Source: publisher figshare collection journal article supplement (https://diabetesjournals.figshare.com/articles/dataset/_/21171376)
Supplement: Supplementary file 2 [file 2]

## SUPPLEMENTAL FILE

**Title:** Dynamic *Ins2* gene activity defines  $\beta$  cell maturity states

**Authors:** Chieh Min Jamie Chu<sup>1\*</sup>, Honey Modi<sup>1\*</sup>, Cara Ellis<sup>1</sup>, Nicole A.J. Krentz<sup>2</sup>, Søs Skovsø<sup>1</sup>, Yiwei Bernie Zhao<sup>3</sup>, Haoning Cen<sup>1</sup>, Noursadeghi N<sup>1</sup>, Evgeniy Panzhinskiy<sup>1</sup>, Xiaoke Hu<sup>1</sup>, Derek A. Dionne<sup>1</sup>, Yi Han Xia<sup>1</sup>, Shouhong Xuan<sup>4</sup>, Mark O. Huising<sup>5,6</sup>, Timothy J. Kieffer<sup>1</sup>, Francis C. Lynn<sup>2</sup>, James D. Johnson<sup>1#</sup>

\* Equal contribution

**Supplemental Table 1:** Primary antibodies

| Antibody Name | Source Species | Company                                  | RRID       | Dilution IHC |
|---------------|----------------|------------------------------------------|------------|--------------|
| Insulin       | Guinea Pig     | Abcam<br>Cat# Ab7842                     | AB_306130  | 1/100        |
| GFP           | Rabbit         | Thermo Fisher<br>Cat# A11122             | AB_221569  | 1/1000       |
| PDX1          | Rabbit         | Abcam<br>Cat# Ab47267                    | AB_777179  | 1/2000       |
| GFP           | Chicken        | USbiological life sciences<br>Cat#168231 | AB_2307313 | 1/200        |
| CHGA          | Sheep          | Biomol International<br>Cat#CA1128       | AB_2291864 | 1:200        |
| CLOCK         | Rabbit         | Thermo Scientific<br>Cat#MA5-32713       | AB_1809990 | 1/50         |
| GRP78         | Rabbit         | Abcam<br>Cat# Ab21685                    | AB_2119834 | 1/500        |
| Proinsulin    | Human          | R&D systems<br>Cat#MAB13361              | AB_2126534 | 1/200        |

**Supplemental Table 2:** qPCR primer sequences

|                 | Forward                    | Reverse                  |
|-----------------|----------------------------|--------------------------|
| <i>Ins1</i>     | 5'TAGTGACCAGCTATAATCAGAG3' | 5'ACGCCAAGGTCTGAAGGTCC3' |
| <i>Ins2</i>     | 5'CCCTGCTGGCCCTGCTCTT3'    | 5'AGGTCTGAAGGTCACCTGCT3' |
| <i>Pre-Ins1</i> | 5'TGGCTTCTTCTACACACCCAAG3' | 5'ACAATGCCACGCTTCTGCC3'  |
| <i>Pre-Ins2</i> | 5'GGGGAGCGTGGCTTCTTCTA3'   | 5'GGGGACAGAATTCAGTGGCA3' |
| <i>gfp</i>      | 5'AGAACGGCATCAAGGTGAAC     | 5'TGCTCAGGTAGTGGTTGTC3'  |

## Supplemental Information

### Estimation of mRNA to protein delays

We estimate that the delay from *gfp* mRNA to fluorescent protein is about 1.3 hours (17.5 min for nuclear export + 0.5 min for initiation + 1 min for elongation + 60 min for maturation). In estimating the delays between transcription, translation and maturation we used the following information:

**Transcription rate:** 6-70 nucleotides/second (Darzacq et al., 2007; Singh and Padgett, 2009). Thus for GFP, which is 1788 nucleotides, it would take between 25 seconds and 5 minutes.

**Splicing time delay:** 30 seconds-10 minutes (Singh and Padgett, 2009)

**Nuclear export time delay:** 5-30 minutes (Oeffinger and Zenklusen, 2012)

**mRNA half-life:** For wildtype GFP, the mRNA half-life has been reported to be 7 hours (Sacchetti et al., 2001).

**Translation time delays:** Translational initiation takes 15-60 seconds and elongation completes 3-6 amino acids / second. Thus for GFP, which is 238 amino acids, we would expect ~40-80 seconds (Gerashchenko et al., 2019; Ingolia et al., 2011; Yan et al., 2016).

**Maturation delay:** The maturation of wildtype GFP takes 36-84 minutes (Balleza et al., 2018).

**Protein half-life:** The protein half-life of wildtype GFP is reported to be 54 hours (Sacchetti et al., 2001).

## References

- Balleza, E., Kim, J.M., and Cluzel, P. (2018). Systematic characterization of maturation time of fluorescent proteins in living cells. *Nat Methods* **15**, 47-51.
- Darzacq, X., Shav-Tal, Y., de Turris, V., Brody, Y., Shenoy, S.M., Phair, R.D., and Singer, R.H. (2007). In vivo dynamics of RNA polymerase II transcription. *Nat Struct Mol Biol* **14**, 796-806.
- Gerashchenko, M.V., Peterfi, Z., and Gladyshev, V.N. (2019). Organ-specific translation elongation rates measured by in vivo ribosome profiling. . *bioRxiv* 279257.
- Ingolia, N.T., Lareau, L.F., and Weissman, J.S. (2011). Ribosome profiling of mouse embryonic stem cells reveals the complexity and dynamics of mammalian proteomes. *Cell* **147**, 789-802.
- Oeffinger, M., and Zenklusen, D. (2012). To the pore and through the pore: a story of mRNA export kinetics. *Biochim Biophys Acta* **1819**, 494-506.
- Sacchetti, A., El Sewedy, T., Nasr, A.F., and Alberti, S. (2001). Efficient GFP mutations profoundly affect mRNA transcription and translation rates. *FEBS Lett* **492**, 151-155.
- Singh, J., and Padgett, R.A. (2009). Rates of in situ transcription and splicing in large human genes. *Nat Struct Mol Biol* **16**, 1128-1133.
- Yan, X., Hoek, T.A., Vale, R.D., and Tanenbaum, M.E. (2016). Dynamics of Translation of Single mRNA Molecules In Vivo. *Cell* **165**, 976-989.
